# Supplementary material for: The impact of the COVID-19 pandemic on lifestyle behavior and accessibility to routine health care among people with type 2 diabetes mellitus: a qualitative study in urban slums of Hyderabad, India
Source: Research Square preprint supplement (doi:10.21203/rs.3.rs-8493135/v1), 2026-02-03
Supplement: Supplementary file 1 [file 6ac878e3ba0f5fd4e26b76c6.docx]

| Topic | Questions |
| --- | --- |
| How does COVID-19 affect people with type 2 diabetes mellitus? | Do you think, people with diabetes are particular vulnerable COVID-19? How and why?  What were socio-economic impacts and psychological effects of the COVID -19 pandemic for people living with diabetes?  Did impact of COVID-19 crisis had changes in your lifestyle behaviour (person's behavior patterns, culture, and surrounding social environment)? How and why?  Did COVID-19 have impact on access to routine health care, diabetes management and social? How and why?  what are the healthcare services are provided in reducing the impact of COVID-19 for people living with diabetes at UPHC/private facilities?  What kind of support and social care is provided by your family and community during COVID-19 crisis?  What your social benefits provided in reducing the impact of COVID-19 for people with diabetes?  Is there anything else you would like to share with me at this point about your experience with COVID-19 crisis? |
